# Supplementary material for: Quantitative measures for the management and comparison of annotated genomes
Source: PubMed Central journal article supplement (PMC2653490; doi:10.1186/1471-2105-10-67), 2009-02-23
Supplement: 1471-2105-10-67-S2.pdf [file 1471-2105-10-67-S2.pdf]

Supplemental Table 2

**Genes With Annotations That May Need Review**

|                 | Gene               | SO Code | SC   |
|-----------------|--------------------|---------|------|
| H. sapiens      | NBPF1              | 13:0:2  | 73   |
|                 | NBPF10             | 12:2:80 | 2367 |
|                 | C3orf41            | 2:0:2   | 8    |
|                 | ZNF365             | 1:0:2   | 4    |
|                 | WWP2               | 1:0:1   | 2    |
|                 | SVEP1              | 1:0:4   | 9    |
|                 | PDE4DIP            | 1:0:3   | 7    |
|                 | KALRN              | 1:0:1   | 2    |
|                 | INPP5F             | 1:0:1   | 2    |
|                 | FLJ31033           | 1:0:4   | 11   |
| M. musculus     | Phf2011            | 6:0:7   | 60   |
|                 | Whsc111            | 3:0:5   | 25   |
|                 | Rgs11              | 3:3:8   | 54   |
|                 | Phip               | 3:2:5   | 27   |
|                 | C330002I19Rik      | 3:0:10  | 37   |
|                 | Srgap2             | 2:0:10  | 31   |
|                 | Kalrn              | 2:0:5   | 20   |
|                 | Flnb               | 2:2:0   | 5    |
|                 | Clasp1             | 2:0:13  | 34   |
|                 | C030046E11Rik      | 2:0:2   | 7    |
| A. gambiae      | ENSANGG00000006332 | 4:0:0   | 6    |
|                 | ENSANGG00000017120 | 2:0:0   | 3    |
|                 | ENSANGG00000019640 | 1:1:1   | 5    |
|                 | ENSANGG00000018885 | 1:0:0   | 1    |
|                 | ENSANGG00000018868 | 1:0:0   | 1    |
|                 | ENSANGG00000018756 | 1:0:0   | 1    |
|                 | ENSANGG00000018693 | 1:0:0   | 1    |
|                 | ENSANGG00000017543 | 1:0:2   | 5    |
|                 | ENSANGG00000017049 | 1:0:1   | 2    |
|                 | ENSANGG00000016139 | 1:0:0   | 1    |
| C. elegans      | WBGene00019237     | 4:0:2   | 7    |
|                 | WBGene00018101     | 3:1:1   | 8    |
|                 | WBGene00009180     | 3:0:3   | 12   |
|                 | WBGene00008555     | 3:0:0   | 3    |
|                 | WBGene00006975     | 3:0:1   | 5    |
|                 | WBGene00006805     | 3:0:3   | 10   |
|                 | WBGene00020784     | 2:0:1   | 3    |
|                 | WBGene00017098     | 2:0:2   | 6    |
|                 | WBGene00016201     | 2:0:3   | 7    |
|                 | WBGene00015887     | 2:2:1   | 10   |
| D. melanogaster | FBgn0013576        | 4:0:10  | 32   |
|                 | FBgn0001624        | 4:0:5   | 25   |
|                 | FBgn0052158        | 3:0:2   | 8    |
|                 | FBgn0013988        | 3:0:3   | 12   |
|                 | FBgn0052425        | 1:0:2   | 2    |
|                 | FBgn0036478        | 1:0:1   | 2    |
| FBgn0026193     | 1:0:13             | 46      |      |
