# Supplementary material for: Quantitative measures for the management and comparison of annotated genomes
Source: PubMed Central journal article supplement (PMC2653490; doi:10.1186/1471-2105-10-67), 2009-02-23
Supplement: 1471-2105-10-67-S3.pdf [file 1471-2105-10-67-S3.pdf]

Additional Table 3

| <b>Number of version-pairs with assembly induced coordinate changes</b> |             |                  |
|-------------------------------------------------------------------------|-------------|------------------|
| Organism                                                                | Release     | # Sequence Pairs |
| <i>H. sapiens</i>                                                       | 33-34.1     | 1,104            |
|                                                                         | 34.1-34.2   | 619              |
|                                                                         | 34.2-34.3   | 484              |
|                                                                         | 34.3-35.1   | 1,281            |
|                                                                         | 35.1-36.1   | 500              |
|                                                                         | 36.1-36.2   | 198              |
| <i>M. musculus</i>                                                      | 30-32.1     | 10,133           |
|                                                                         | 32.1-33.1   | 7,642            |
|                                                                         | 33.1-34.1   | 4,505            |
|                                                                         | 34.1-35.1   | 3,601            |
|                                                                         | 35.1-36.1   | 16               |
| <i>D. melanogaster</i>                                                  | r3.2-r4.2   | 133              |
|                                                                         | r4.2-r4.3   | 18               |
|                                                                         | r4.3-r5.1   | 23               |
| <i>C. elegans</i>                                                       | WS100-WS130 | 151              |
|                                                                         | WS130-WS150 | 30               |
|                                                                         | WS150-WS160 | 21               |
|                                                                         | WS160-WS176 | 36               |
